# Supplementary material for: Heat shock factor 1 protects germ cell proliferation during early ovarian differentiation in medaka
Source: PubMed Central journal article supplement (PMC6502851; doi:10.1038/s41598-019-43472-4), 2019-05-06
Supplement: 41598_2019_43472_MOESM1_ESM.pdf [file 41598_2019_43472_MOESM1_ESM.pdf]

# **Heat shock factor 1 protects germ cell proliferation during early ovarian differentiation in medaka**

Fumiya Furukawa<sup>1</sup>, Shin Hamasaki<sup>1</sup>, Seiji Hara<sup>1</sup>, Tomoya Uchimura<sup>1</sup>, Eri Shiraishi<sup>1</sup>, Natsumi Osafune<sup>1</sup>, Hisanori Takagi<sup>1</sup>, Takashi Yazawa<sup>2</sup>, Yasuhiro Kamei<sup>3</sup> & Takeshi Kitano<sup>1</sup>

<sup>1</sup>Department of Biological Sciences, Graduate School of Science and Technology, Kumamoto University, Kumamoto 860-8555, Japan. <sup>2</sup>Department of Biochemistry, Asahikawa Medical University, Asahikawa, Hokkaido 078-8510, Japan. <sup>3</sup>Spectrography and Bioimaging Facility, National Institute for Basic Biology Core Research Facilities, National Institute for Basic Biology, Okazaki 444-8585, Japan. Correspondence and requests for materials should be addressed to T.K. (email: tkitano@kumamoto-u.ac.jp)

**Supplementary Table S1.** Genes examined by RNA-seq analysis. Value log<sub>2</sub> (fold-change) represents the logarithm of FPKM.

| Gene              | FPKM      |           | log <sub>2</sub> (fold change) |
|-------------------|-----------|-----------|--------------------------------|
|                   | WT        | HSF1 KO   |                                |
| <i>hsf1</i>       | 19.9736   | 10.7239   | -0.897268                      |
| <i>hsf2</i>       | 10.1859   | 5.88019   | -0.792643                      |
| <i>hsf2bp</i>     | 1.71990   | 1.45330   | -0.242992                      |
| <i>hsf4</i>       | 0.0614395 | 0.0566860 | -0.116174                      |
| <i>hsp70.1</i>    | 56.4562   | 2.54311   | -4.47247                       |
| <i>hsp90aa1.1</i> | 163.257   | 40.0666   | -2.02667                       |
| <i>hsp90aa1.2</i> | 31.1258   | 16.4092   | -0.923608                      |
| <i>hsp90ab1</i>   | 2341.12   | 2081.86   | -0.169329                      |
| <i>hsp90ab1</i>   | 1032.48   | 933.118   | -0.145978                      |
| <i>hsp90b1</i>    | 283.355   | 363.5365  | 0.359490                       |
| <i>hspa12a</i>    | 4.95635   | 2.67977   | -0.887172                      |
| <i>hspa12b</i>    | 1.49872   | 0.775428  | -0.950667                      |
| <i>hspa13</i>     | 7.27108   | 9.80543   | 0.431410                       |
| <i>hspa14</i>     | 15.2382   | 19.7159   | 0.371672                       |
| <i>hspa4a</i>     | 20.9678   | 10.6189   | -0.981541                      |
| <i>hspa4b</i>     | 84.59250  | 76.96310  | -0.13636                       |
| <i>hspa4l</i>     | 4.78437   | 4.08554   | -0.227802                      |
| <i>hspa5</i>      | 324.034   | 394.317   | 0.283209                       |
| <i>hspa8</i>      | 50.4852   | 36.3321   | -0.474616                      |
| <i>hspb1</i>      | 508.726   | 224.961   | -1.17722                       |
| <i>hspb11</i>     | 110.193   | 466.370   | 2.08145                        |
| <i>hspb15</i>     | 41.6360   | 43.2955   | 0.0563857                      |
| <i>hspb8</i>      | 58.3947   | 187.963   | 1.68654                        |
| <i>hspbap1</i>    | 5.17284   | 7.33334   | 0.503514                       |
| <i>hsbp1</i>      | 25.2838   | 25.4804   | 0.0111775                      |
| <i>hspd1</i>      | 7.90706   | 5.96997   | -0.405419                      |
| <i>hspd1</i>      | 123.841   | 162.144   | 0.388788                       |

|                 |           |           |            |
|-----------------|-----------|-----------|------------|
| <i>hspe1</i>    | 375.510   | 555.975   | 0.566167   |
| <i>hspg2</i>    | 7.97305   | 6.72602   | -0.245379  |
| <i>foxl2</i>    | 0.179343  | 0.206517  | 0.203543   |
| <i>cyp19a1a</i> | 0.0631787 | 0.0865760 | 0.454530   |
| <i>cyp19a1b</i> | 0.512715  | 0.576616  | 0.169455   |
| <i>gsdf</i>     | 4.92977   | 4.05337   | -0.282398  |
| <i>amh</i>      | 3.15737   | 2.75156   | -0.198472  |
| <i>amhr2</i>    | 0.67471   | 1.89983   | 1.493540   |
| <i>dmrt1</i>    | 0         | 0         |            |
| <i>dnd</i>      | 0.51471   | 0.150731  | -1.771770  |
| <i>bax</i>      | 33.6838   | 59.6666   | 0.824869   |
| <i>caspase8</i> | 21.52380  | 50.5877   | 1.232850   |
| <i>caspase9</i> | 4.62048   | 8.33648   | 0.851397   |
| <i>efl</i>      | 3594.24   | 3437.81   | -0.0641978 |

---
